# Supplementary material
Source: publisher figshare collection journal article supplement (https://tandf.figshare.com/articles/dataset/_/25714726)
Supplement: Supplementary file [file 2]

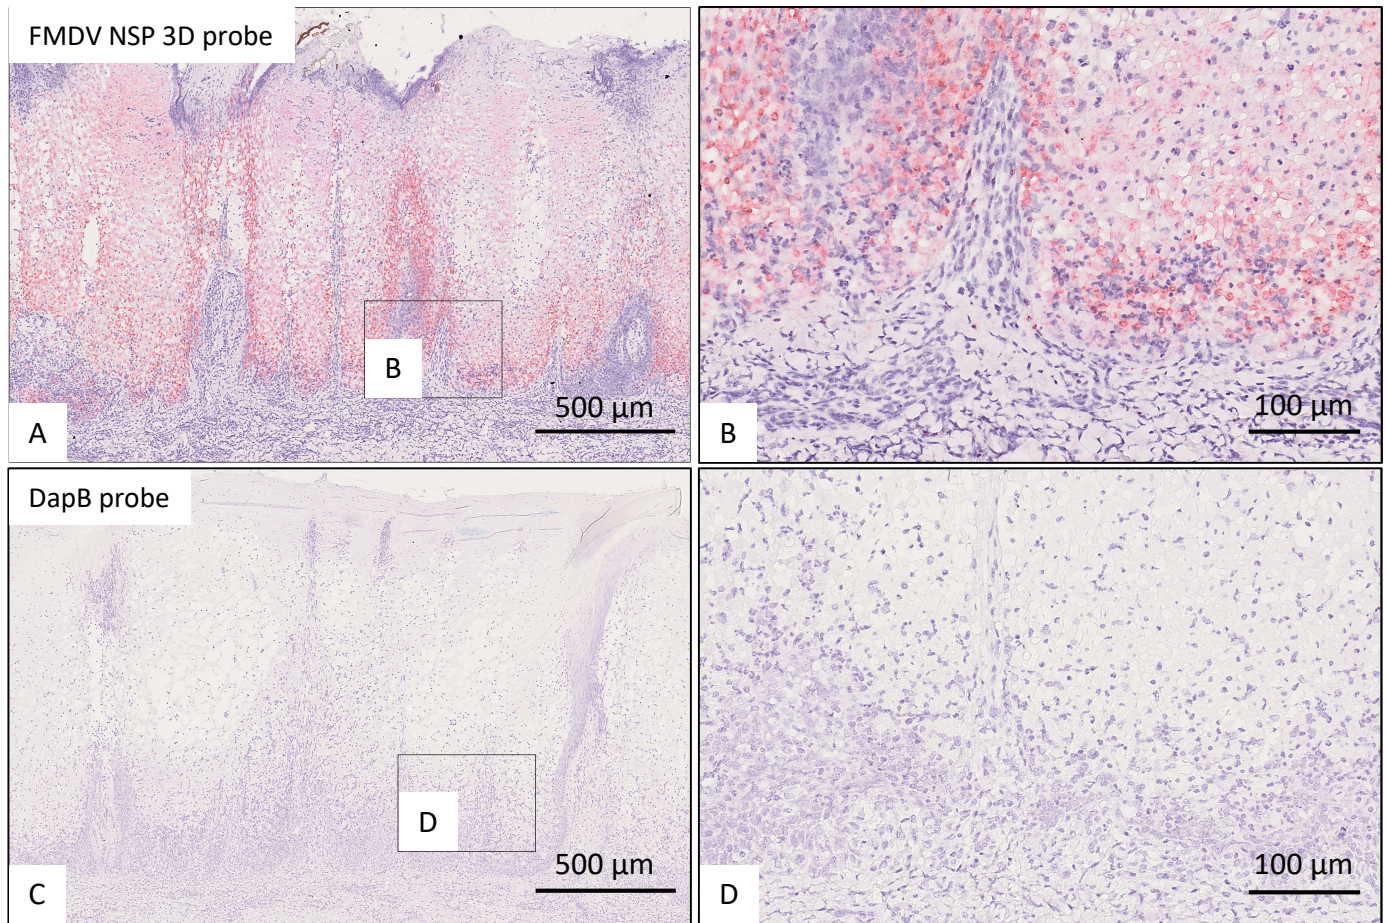

**Suppl. Fig.** RNA in-situ hybridization with the tongue of an acutely FMDV-infected heifer collected 2 dpi. A-B) Treatment with the FMDV NSP 3D probe results in a high number of positive signals (=positive control), (B) shows a magnification of (A). C-D) Incubation of a consecutive section of (A) with the negative control probe DapB shows no signal (=technical control), (D) shows a magnification of (C).
